# Supplementary material for: The polymyxin B-induced transcriptomic response of a clinical, multidrug-resistant Klebsiella pneumoniae involves multiple regulatory elements and intracellular targets
Source: PubMed Central journal article supplement (PMC5088521; doi:10.1186/s12864-016-3070-y), 2016-10-25

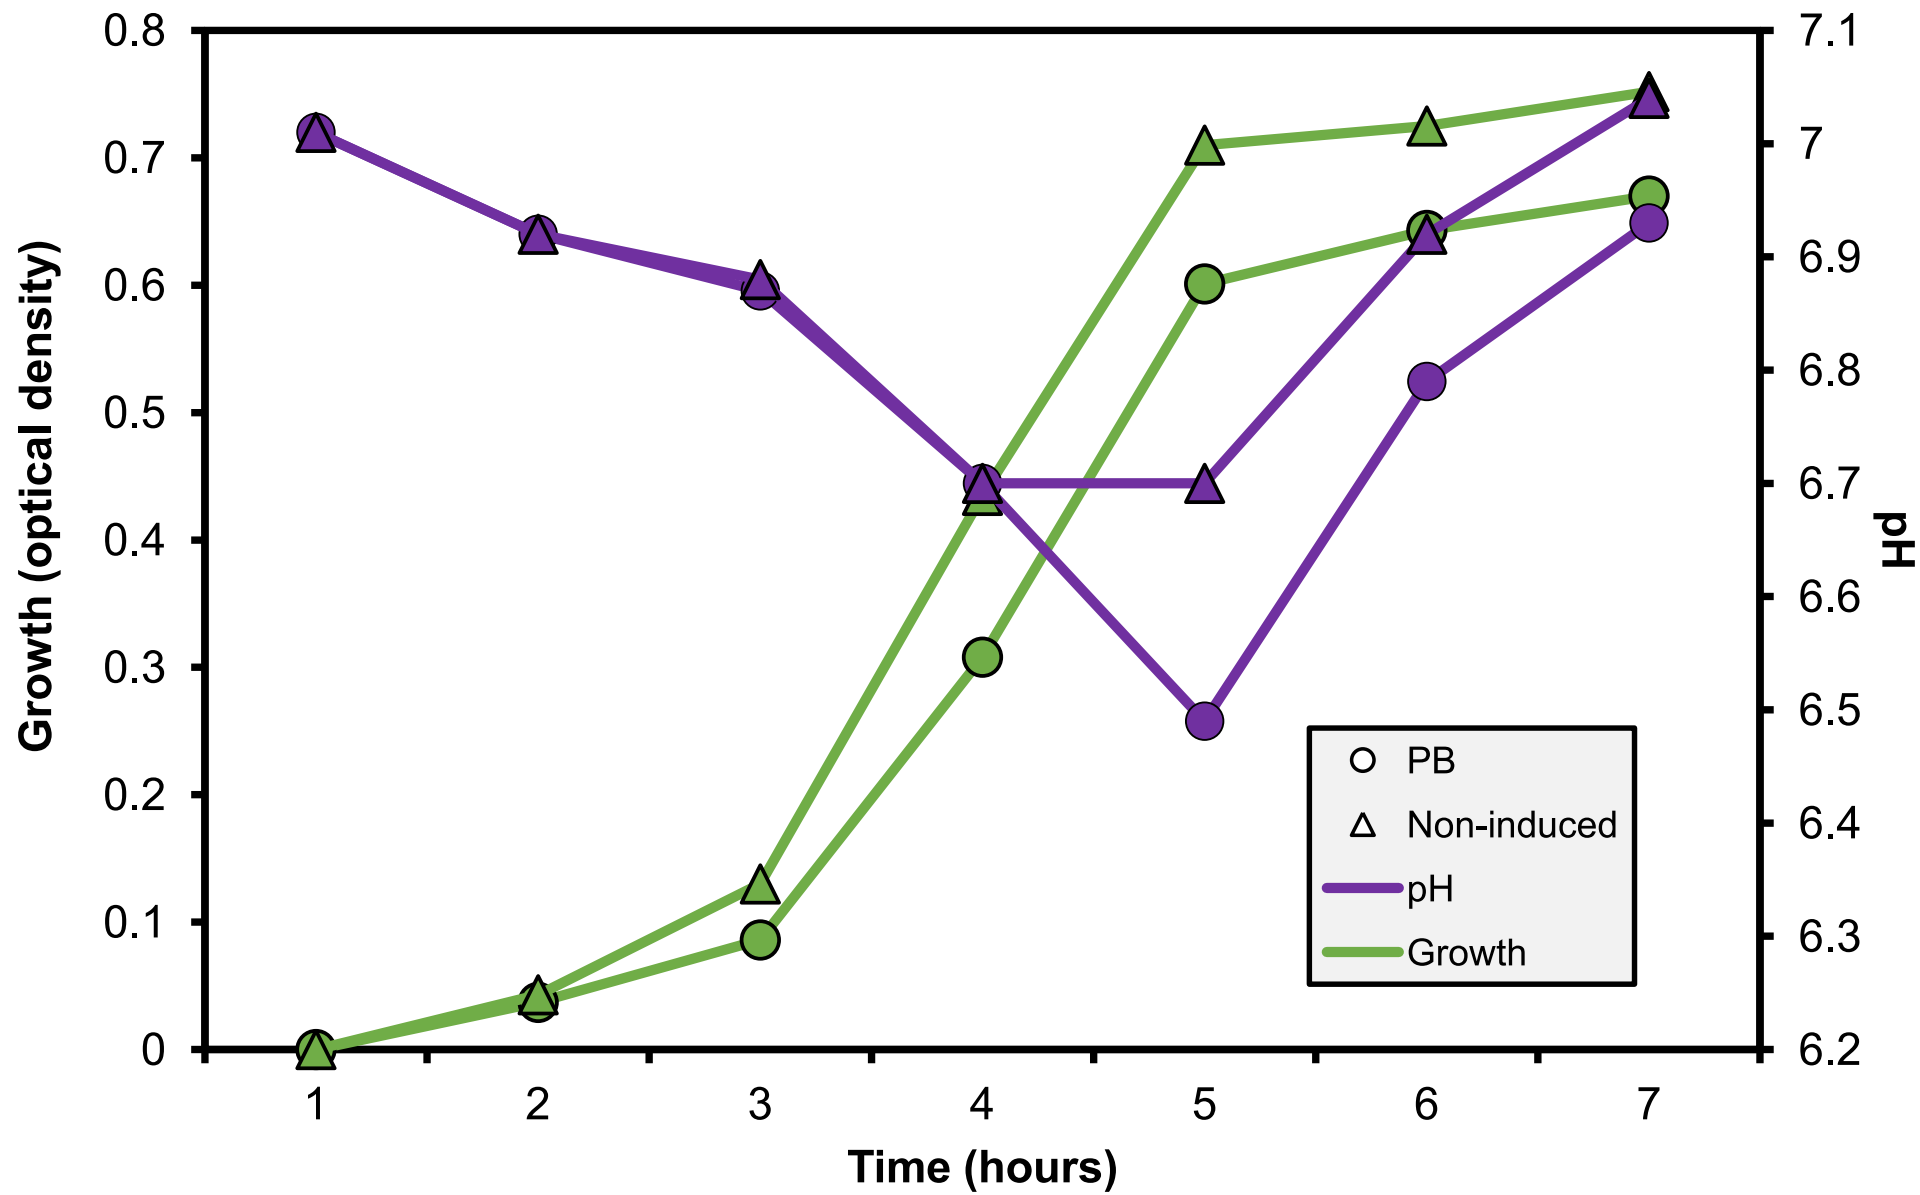

Supplement: 12864_2016_3070_MOESM4_ESM.pdf [file 12864_2016_3070_MOESM4_ESM.pdf]
